# Supplementary material
Source: Springer Nature journal article supplement (https://www.springermedizin.de/resource/supplementary/12961_2014_339_MOESM4_ESM.pdf/9571076)

# Average number NHIS claims / active member / annum

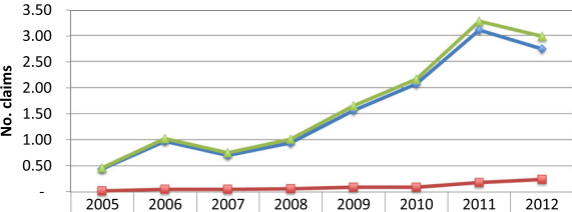

|       |      |      |      |      |      |      |      |      |
|-------|------|------|------|------|------|------|------|------|
| OP    | 0.44 | 0.97 | 0.70 | 0.94 | 1.56 | 2.07 | 3.10 | 2.74 |
| IP    | 0.02 | 0.05 | 0.05 | 0.06 | 0.09 | 0.09 | 0.18 | 0.24 |
| OP&IP | 0.46 | 1.02 | 0.75 | 1.01 | 1.65 | 2.16 | 3.27 | 2.98 |

Supplement: MOESM4 [file 9571076]
